# Supplementary material for: Impact of Tilapia hepcidin 2-3 dietary supplementation on the gut microbiota profile and immunomodulation in the grouper (Epinephelus lanceolatus)
Source: PubMed Central journal article supplement (PMC6910925; doi:10.1038/s41598-019-55509-9), 2019-12-13

## Additional Information

### **Impact of *Tilapia* hepcidin 2-3 dietary supplementation on the gut microbiota profile and immunomodulation in the grouper (*Epinephelus lanceolatus*)**

Chen-Hung Ting<sup>1</sup>, Chieh-Yu Pan<sup>2</sup>, Yi-Chun Chen<sup>1</sup>, Yu-Chun Lin<sup>1</sup>, Tzong-Yueh Chen<sup>3</sup>, Venugopal Rajanbabu<sup>4</sup>, Jyh-Yih Chen<sup>1,5,6\*</sup>

1. Marine Research Station, Institute of Cellular and Organismic Biology, Academia Sinica, 23-10 Dahuen Road, Jiaushi, Ilan 262, Taiwan
2. Department and Graduate Institute of Aquaculture, National Kaohsiung University of Science and Technology, Kaohsiung 811, Taiwan
3. Institute of Biotechnology & Department of Biotechnology and Bioindustry Sciences, National Cheng Kung University, Tainan 701, Taiwan
4. Anbil Dharmalingam Agricultural College and Research Institute, Tamil Nadu Agricultural university, Tiruchchirapalli 620027, Tamil Nadu, India
5. The iEGG and Animal Biotechnology Center, National Chung Hsing University, Taichung 402, Taiwan
6. Center of Excellence for the Oceans, National Taiwan Ocean University, Keelung 202, Taiwan

\* Corresponding author (Jyh-Yih Chen)

Marine Research Station, Institute of Cellular and Organismic Biology, Academia Sinica, 23-10 Dahuen Road, Jiaushi, Ilan 262, Taiwan.

Tel.: +886-920802111

Fax: +886-39871035

E-mail address: [zoocjy@gate.sinica.edu.tw](mailto:zoocjy@gate.sinica.edu.tw)

## Supplementary Figure legends

**Supplementary Figure 1.** Abundance analyses at the genus level. **(a, b)** Bacteria from the phyla *Firmicutes* (a) and *Bacteroidetes* (b) were analyzed for their abundance in regular diet and rTH2-3-supplemented groups. Specific bacteria belonging to the families *Lachnospiraceae* and *Ruminococcaceae* are indicated in (a). Results are presented as mean  $\pm$  SD (n = 3 in each group), \* $p$  < 0.05; \*\* $p$  < 0.01 between groups, analyzed by STAMP, Welch's t-test.

**Supplementary Figure 2.** PICRUSt classification of KEGG Orthology (KO). **(a–g)** Predicted functional genes in the categories of environmental information processing (a), genetic information (b), human diseases (c), immune system (d), metabolism (e–g) at KEGG level 3 are shown for the gut microbiota. Results are presented as mean  $\pm$  SEM (n = 3 in each group).

**Supplementary Table 1.** Primer sequences used for quantitative real-time PCR.

| Genes (Predicted)               | Sequence                                                     | Reference species            |
|---------------------------------|--------------------------------------------------------------|------------------------------|
| <i><math>\beta</math>-Actin</i> | F: TGTGTCATCTTCTCCCTGT<br>R: GAGAGGTATCCTGACTCTGAAGTA        | <i>Oryzias latipes</i>       |
| <i>Lysozyme</i>                 | F: GACATTCAGTCCAGCCTAGAGTCC<br>R: CCCGACTCCCCTGGCTC          | <i>Epinephelus coioides</i>  |
| <i>C6</i>                       | F: TTGAGGCGTCACAGCGA<br>R: GGCCTGTTCTCTCAGGA                 | <i>Amphiprion ocellaris</i>  |
| <i>C7</i>                       | F: CGATCACAGCTCCAACC<br>R: AAGAGCCACAGAGGAGT                 | <i>Labrus bergylta</i>       |
| <i>CCL1</i>                     | F: ATCTCAGTCTCAGGTTTCATTG<br>R: TCTCCATCATCACATCCACT         | <i>Epinephelus coioides</i>  |
| <i>Tlr-5</i>                    | F: AGAAATGGTGATTCAAGACCC<br>R: TCAAATGTGAATTTCCATCTGATTTCTAT | <i>Epinephelus bruneus</i>   |
| <i>Transferrin</i>              | F: GCAACATGGGCTAGTGGTGT<br>R: AATGCGAACAACCTCATTGC           | <i>Epinephelus coioides</i>  |
| <i>Il-1<math>\beta</math></i>   | F: TAAACCTCTGTGTGGCG<br>R: CACTGACCTGCACAGAC                 | <i>Epinephelus coioides</i>  |
| <i>Il-8</i>                     | F: CATGATGGAAGCCATGAG<br>R: GTCAGCGTGTGAGGAAT                | <i>Oplegnathus fasciatus</i> |
| <i>Mhc-I<math>\alpha</math></i> | F: TCTCCTGGTGTTACTGTCATAG<br>R: CGCTTCTGCTTCTCGTG            | <i>Epinephelus coioides</i>  |
| <i>Mhc-II</i>                   | F: CATGGCCTCACCTCTAC<br>R: TGTGGGATTAGAACTGGACA              | <i>Sebastes schlegelii</i>   |

# Supplementary Figure 1

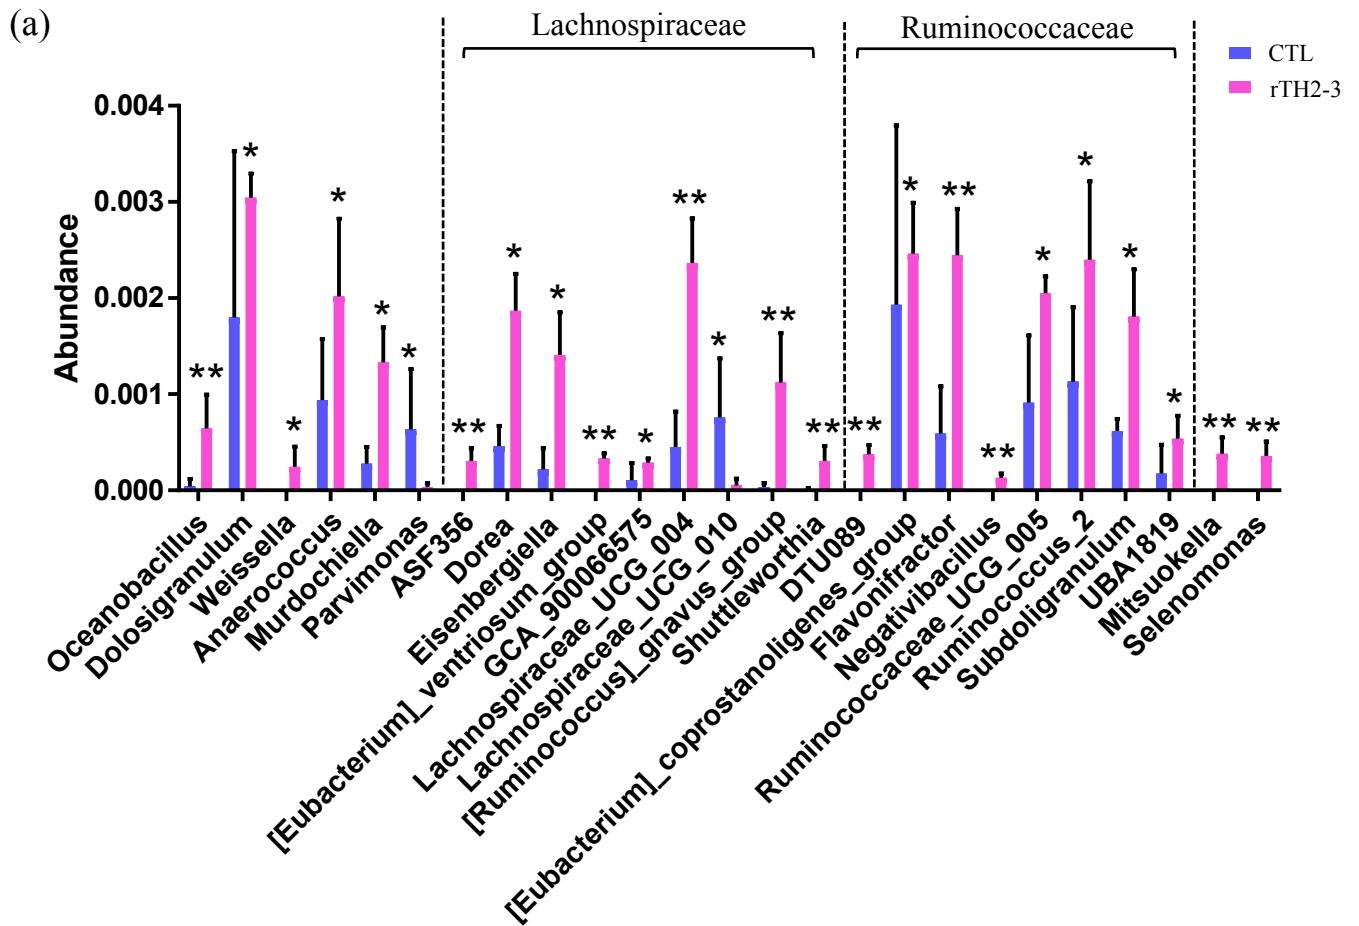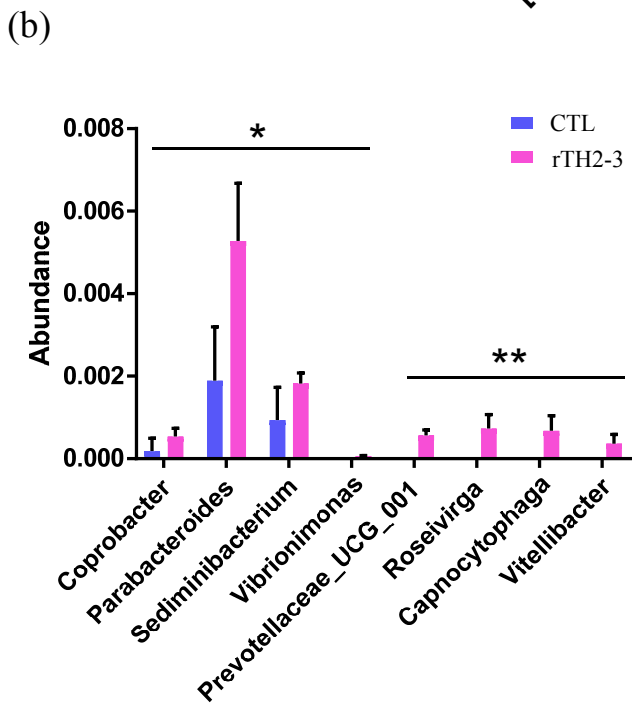

# Supplementary Figure 2

(a)

CTL  
rTH2

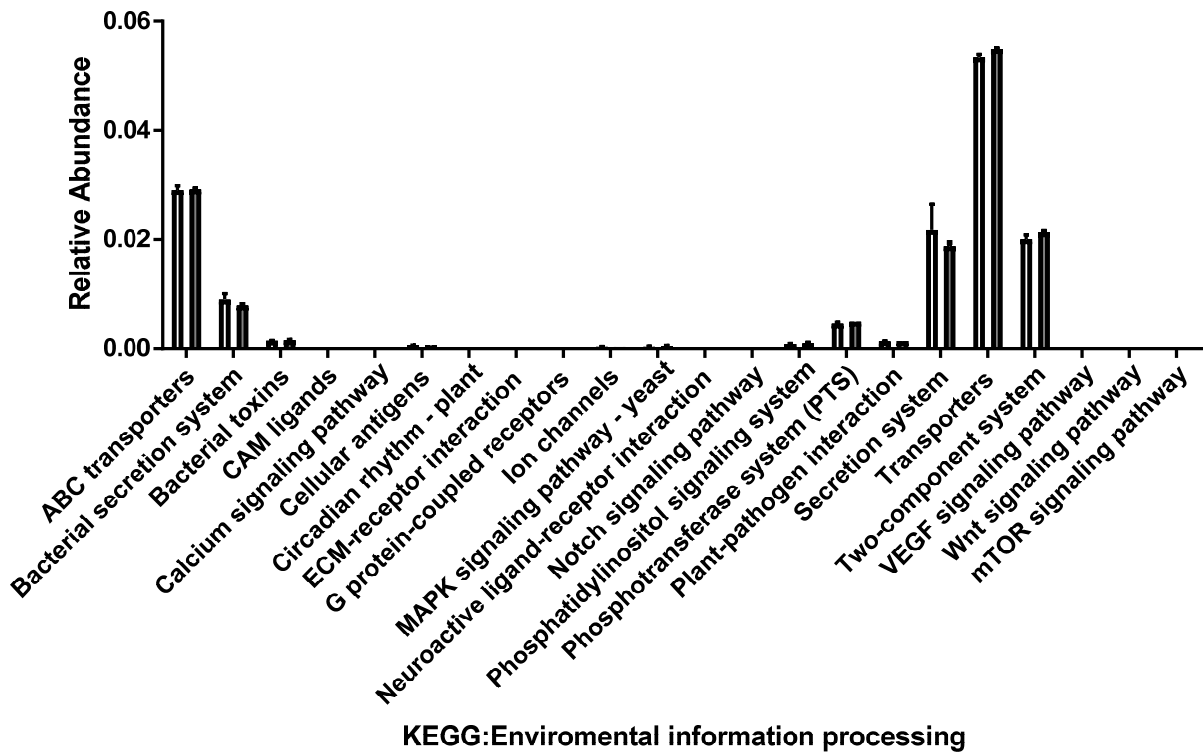

(b)

CTL  
rTH2-3

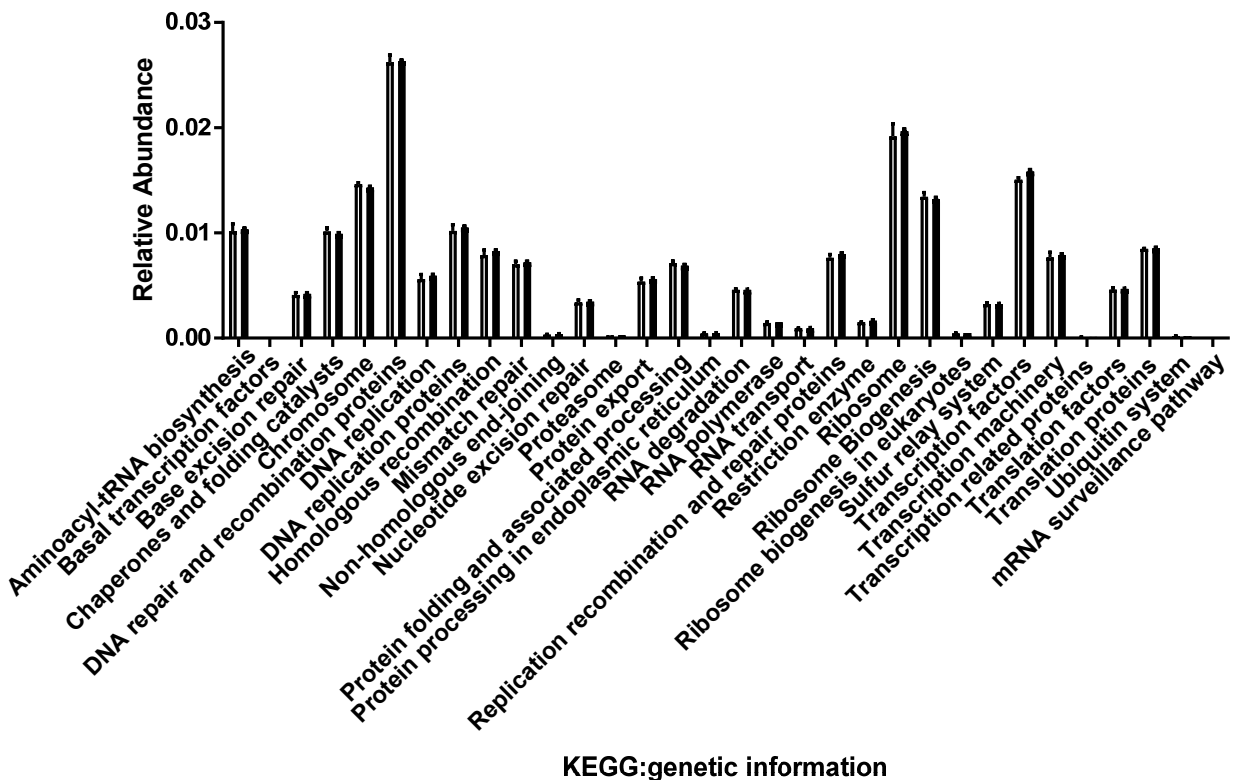

# Supplementary Figure 2

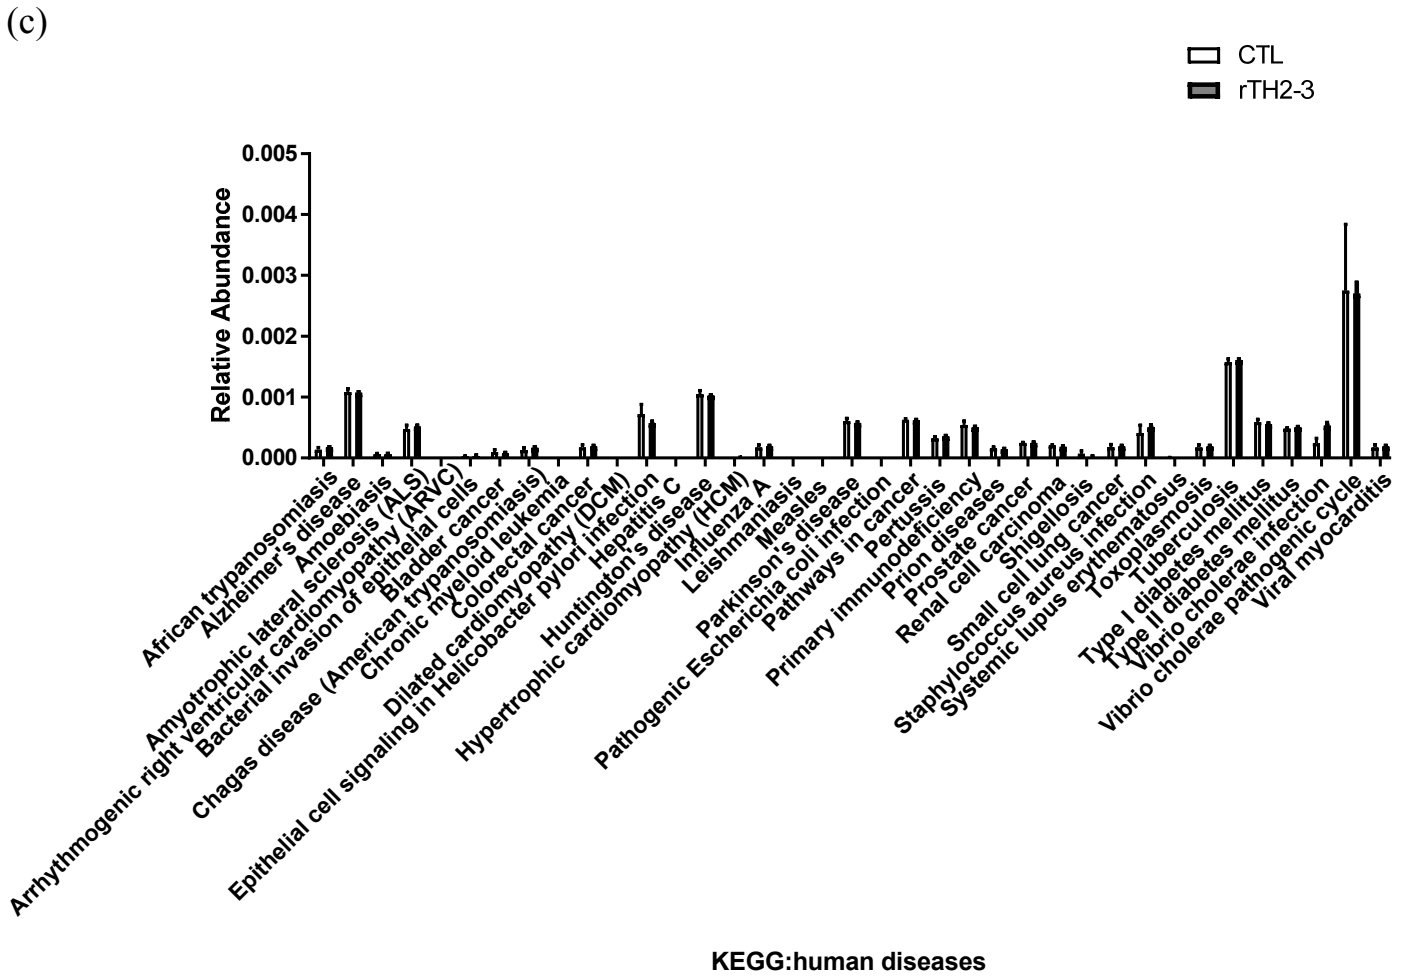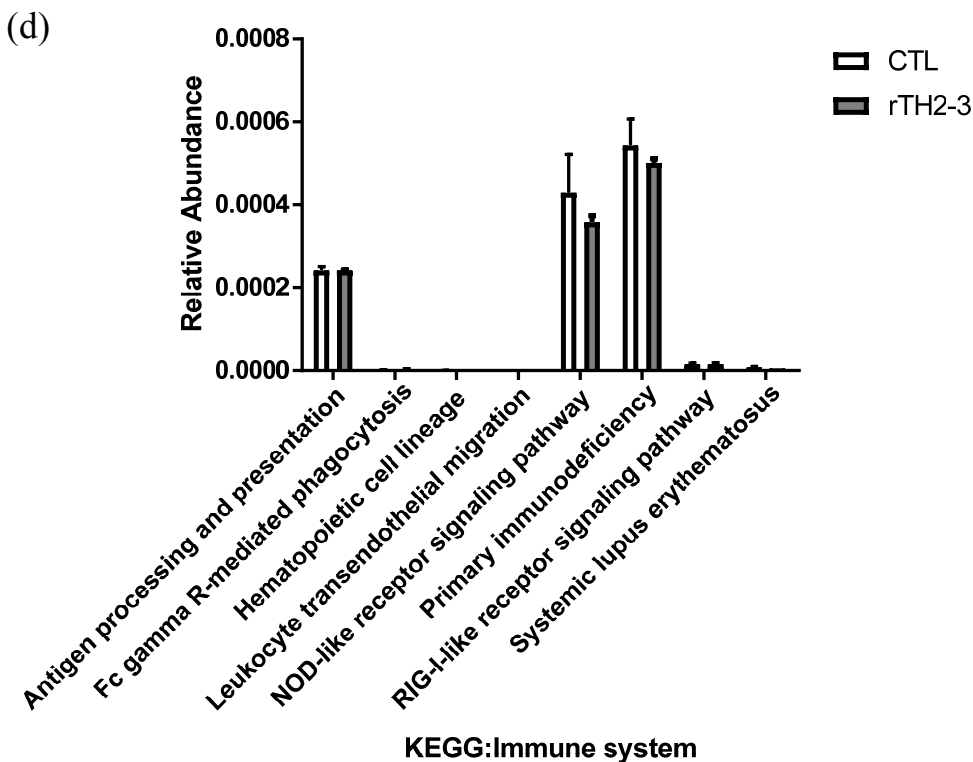



# Supplementary Figure 2

(g)

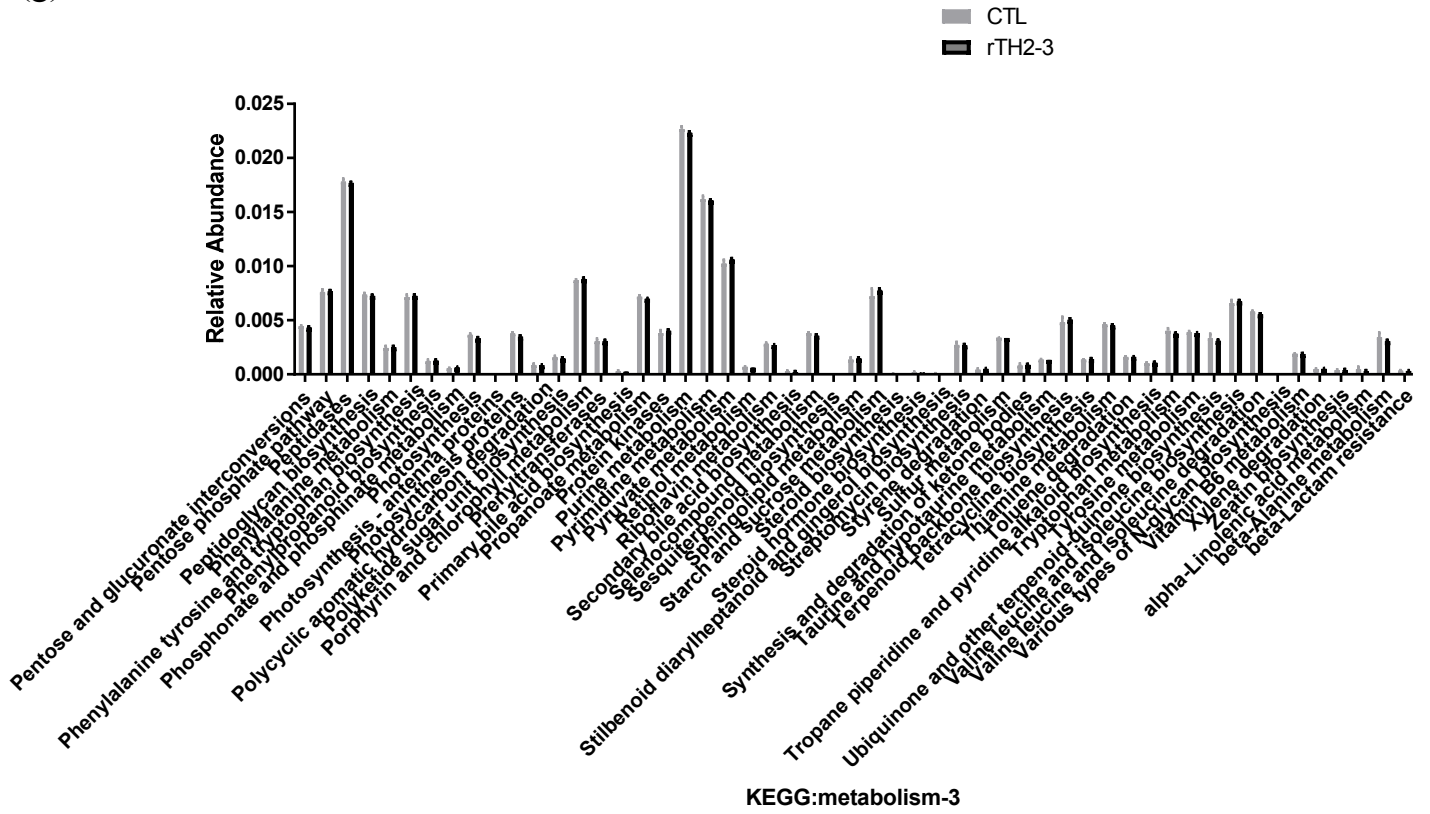

Supplement: 41598_2019_55509_MOESM1_ESM.pdf [file 41598_2019_55509_MOESM1_ESM.pdf]
